# Supplementary material
Source: PubMed Central journal article supplement (PMC7052997)
Supplement: jcsm.16.1.55.SD1.pdf [file jcsm.16.1.55.SD1.pdf]

**Table S1.** Descriptive statistics for all adult patients with ischemic stroke, transient ischemic attack, intracerebral hemorrhage, subarachnoid hemorrhage stratified by whether or not they were included for analysis

|                                                         | All Patients   | Included in Analysis | Excluded from Analysis | P-value |
|---------------------------------------------------------|----------------|----------------------|------------------------|---------|
| <b>N</b>                                                | 4149           | 2213                 | 1936                   |         |
| <b>Age, mean (SD)</b>                                   | 62.2 (14.8)    | 60.7 (14.7)          | 63.9 (14.7)            | < 0.001 |
| <b>Female</b>                                           | 2019 (48.7%)   | 1093 (49.4%)         | 926 (47.8%)            | 0.331   |
| <b>Race</b>                                             |                |                      |                        |         |
| White                                                   | 3017 (72.7%)   | 1755 (79.3%)         | 1262 (65.2%)           | < 0.001 |
| Black                                                   | 875 (21.1%)    | 338 (15.3%)          | 537 (27.7%)            |         |
| Other                                                   | 107 (2.6%)     | 36 (1.6%)            | 71 (3.7%)              |         |
| Missing                                                 | 150 (3.6%)     | 84 (3.8%)            | 66 (3.4%)              |         |
| <b>Marital Status</b>                                   |                |                      |                        |         |
| Married                                                 | 2321 (55.9%)   | 1358 (61.4%)         | 963 (49.7%)            | < 0.001 |
| Single                                                  | 943 (22.7%)    | 433 (19.6%)          | 510 (26.3%)            |         |
| Divorced                                                | 349 (8.4%)     | 176 (8.0%)           | 173 (8.9%)             |         |
| Widowed                                                 | 377 (9.1%)     | 166 (7.5%)           | 211 (10.9%)            |         |
| Missing                                                 | 159 (3.8%)     | 80 (3.6%)            | 79 (4.1%)              |         |
| <b>Median Income by Zip Code (x \$1,000), mean (SD)</b> | 50.7 (17.8)    | 52.6 (17.8)          | 48.4 (17.4)            | < 0.001 |
| <b>BMI (kg/m<sup>2</sup>), median (IQR)</b>             | 28 (24, 32)    | 28 (24, 32)          | 27 (24, 32)            | 0.253   |
| <b>Depression</b>                                       | 629 (15.2%)    | 346 (15.6%)          | 283 (14.6%)            | 0.385   |
| <b>Active Antidepressant(s) Prescription</b>            | 985 (23.7%)    | 541 (24.4%)          | 444 (22.9%)            | 0.269   |
| <b>Stroke Type</b>                                      |                |                      |                        |         |
| Ischemic                                                | 2700 (65.1%)   | 1412 (63.8%)         | 1288 (66.5%)           | 0.095   |
| Transient Ischemic Attack                               | 681 (16.4%)    | 384 (17.4%)          | 297 (15.3%)            |         |
| Intracerebral Hemorrhage                                | 410 (9.9%)     | 212 (9.6%)           | 198 (10.2%)            |         |
| Subarachnoid Hemorrhage                                 | 358 (8.6%)     | 205 (9.3%)           | 153 (7.9%)             |         |
| <b>Days Since Stroke, median (IQR)</b>                  | 74 (34, 366.5) | 98 (38, 459)         | 59 (31, 269)           | < 0.001 |
| <b>NIHSS Score, median (IQR)</b>                        | 0 (0, 1)       | 0 (0, 1)             | 0 (0, 2)               | < 0.001 |

|                                                      |              |              |             |         |
|------------------------------------------------------|--------------|--------------|-------------|---------|
| <b>NIHSS Score Categorized</b>                       |              |              |             |         |
| 0                                                    | 2223 (53.6%) | 1263 (57.1%) | 960 (49.6%) | < 0.001 |
| 1-5                                                  | 1111 (26.8%) | 509 (23.0%)  | 602 (31.1%) |         |
| > 5                                                  | 239 (5.8%)   | 68 (3.1%)    | 171 (8.8%)  |         |
| Missing                                              | 576 (13.9%)  | 373 (16.9%)  | 203 (10.5%) |         |
| <b>Modified Rankin Scale Score,<br/>median (IQR)</b> | 1 (0, 2)     | 1 (0, 2)     | 1 (1, 2)    | < 0.001 |

Patients were included in the study cohort if they had one or more sleep-related scales completed during their office visit(s). SD = standard deviation; BMI= body mass index; IQR = interquartile range; NIHSS = National Institutes of Health Stroke Scale
